# Supplementary material for: Incidence and Risk of Hypertension in Cancer Patients Treated With Atezolizumab and Bevacizumab: A Systematic Review and Meta-Analysis
Source: PubMed Central journal article supplement (PMC8546244; doi:10.3389/fonc.2021.726008), 2021-10-12

## **Supplementary material**

### **Contents**

- 1. Supplementary 1** Search strategy
- 2. Supplementary table 1.** Risk of bias assessment for included trials
- 3. Supplementary figure 1.** Results of sensitivity analysis
- 4. Supplementary figure 2.** Forest plot for subgroup analyses in relative risk of atezolizumab plus bevacizumab-associated hypertension versus control
- 5. Supplementary figure 3.** Funnel plot for publication bias
- 6. Supplementary figure 4.** Assessment of publication bias by Egger's test.
- 7. Supplementary figure 5.** Assessment of publication bias by Begg's test.

## **Supplementary 1: literature search strategy for the databases**

This appendix contains listings of search terms and the number of search results used in the literature searches to develop the systematic literature review.

### **Search Strategy 1**

Search strategy for PubMed from inception to 6<sup>th</sup>, March, 2021

#1 (atezolizumab) OR (anti-PDL1) OR (MPDL3280A) OR (MPDL-3280A) OR (Tecentriq) OR (RG7446) OR (RG-7446)

#2 (Bevacizumab) OR (Mvasi) OR (Bevacizumab-awwb) OR (Bevacizumab awwb) OR (Avastin)

#3 (Neoplasms[MeSH Terms]) OR (Neoplasia[Title/Abstract]) OR (Neoplasias[Title/Abstract]) OR (Neoplasm[Title/Abstract]) OR (Tumors[Title/Abstract]) OR (Tumor[Title/Abstract]) OR (Cancer[Title/Abstract]) OR (Cancers[Title/Abstract]) OR (Malignancy[Title/Abstract]) OR (Malignancies[Title/Abstract]) OR (Malignant Neoplasms[Title/Abstract]) OR (Malignant Neoplasm[Title/Abstract]) OR (Neoplasm, Malignant[Title/Abstract]) OR (Neoplasms, Malignant[Title/Abstract]) OR (Benign Neoplasms[Title/Abstract]) OR (Neoplasms, Benign[Title/Abstract]) OR (Benign Neoplasm[Title/Abstract]) OR (Neoplasm, Benign[Title/Abstract])

#4 (Hypertension [MeSH Terms]) OR (Blood Pressure, High[Text Word]) OR (Blood Pressures, High[Text Word]) OR (High Blood Pressure[Text Word]) OR (High Blood Pressures[Text Word])

#5 (((((((epidemiologic studies[MeSH Terms])) OR (cohort studies[MeSH Terms])) OR (epidemiologic[Text Word])) OR (longitudinal[Text Word])) OR (cohort[Text Word])) OR (follow up[Text Word])) OR (observational[Text Word])) OR (prospective[Text Word])

#6 humans[MeSH Terms]

#7 review[Publication Type]

#8 #1 AND #2 AND #3 AND #4 AND #5 AND #6 NOT #7

### **Search Strategy 2**

Search strategy for Embase from inception to 6<sup>th</sup>, March, 2021

#1 'atezolizumab':ti,ab,kw OR 'anti-PDL1':ti,ab,kw OR 'MPDL3280A':ti,ab,kw OR 'MPDL-3280A':ti,ab,kw OR 'Tecentriq':ti,ab,kw OR 'RG7446':ti,ab,kw OR 'RG-7446':ti,ab,kw

#2 'Bevacizumab':ti,ab,kw OR 'Mvasi':ti,ab,kw OR 'Bevacizumab-awwb':ti,ab,kw OR 'Bevacizumab awwb':ti,ab,kw OR 'Avastin':ti,ab,kw

#3 'Neoplasms':ti,ab,kw OR 'Neoplasia':ti,ab,kw OR 'Neoplasias':ti,ab,kw OR 'Neoplasm':ti,ab,kw OR 'Tumors':ti,ab,kw OR 'Tumor':ti,ab,kw OR 'Cancer':ti,ab,kw OR 'Cancers':ti,ab,kw OR 'Malignancy':ti,ab,kw OR 'Malignancies':ti,ab,kw OR 'Malignant Neoplasms':ti,ab,kw OR 'Malignant Neoplasm':ti,ab,kw OR 'Neoplasm, Malignant':ti,ab,kw OR 'Neoplasms, Malignant':ti,ab,kw OR 'Benign Neoplasms':ti,ab,kw OR 'Neoplasms, Benign':ti,ab,kw OR 'Benign Neoplasm':ti,ab,kw OR 'Neoplasm, Benign':ti,ab,kw

#4 #1 AND #2 AND #3 AND [humans]/lim

### **Search Strategy 3**

Search strategy for Web of science from inception to 6<sup>th</sup>, March, 2021

#1 TS=((atezolizumab) OR (anti-PDL1) OR (MPDL3280A) OR (MPDL-3280A) OR (Tecentriq) OR (RG7446) OR (RG-7446) )

#2 TS=((Bevacizumab) OR (Mvasi) OR (Bevacizumab-awwb) OR (Bevacizumab awwb) OR (Avastin) )

#3

TS=((Neoplasms) OR (Neoplasia) OR (Neoplasias) OR (Neoplasm) OR (Tumors) OR (Tumor) OR (Cancer) OR (Cancers) OR (Malignancy) OR (Malignancies) OR (Malignant Neoplasms) OR (Malignant Neoplasm) OR (Neoplasm, Malignant) OR (Neoplasms, Malignant) OR (Benign Neoplasms) OR (Neoplasms, Benign) OR (Benign Neoplasm) OR (Neoplasm, Benign) )

#4 TS=((cohort) OR (longitudinal) OR (follow ) OR (prospective) OR (observational))

#5 #1 AND #2 AND #3 AND #4

**Supplementary table 1.** Newcastle-Ottawa Scale for risk of bias assessment of studies included in the meta-analysis.

| Study            | Selection                            |                         |                           |                              | Comparability | Outcome               |                           |                       | Overall |
|------------------|--------------------------------------|-------------------------|---------------------------|------------------------------|---------------|-----------------------|---------------------------|-----------------------|---------|
|                  | Representativeness of exposed cohort | Selection of nonexposed | Ascertainment of exposure | Outcome not present at start |               | Assessment of outcome | Adequate follow-up length | Adequacy of follow-up |         |
| Moroney et al.   | ★                                    | ★                       | ★                         | ★                            | ★             | ★                     | ★                         | ★                     | 8       |
| Morris et al.    | ★                                    | ★                       | ★                         | ★                            | ☆             | ★                     | ★                         | ★                     | 7       |
| McGregor et al.  | ★                                    | ★                       | ★                         | ★                            | ★             | ★                     | ★                         | ★                     | 8       |
| Lee et al.       | ★                                    | ★                       | ★                         | ★                            | ★             | ★                     | ★                         | ★                     | 8       |
| Halperin et al.  | ★                                    | ★                       | ★                         | ★                            | ☆             | ★                     | ★                         | ★                     | 7       |
| Friedman et al.  | ★                                    | ★                       | ★                         | ★                            | ☆             | ★                     | ★                         | ★                     | 7       |
| Finn et al.      | ★                                    | ★                       | ★                         | ★                            | ★★            | ★                     | ★                         | ★                     | 9       |
| Rini et al.      | ★                                    | ★                       | ★                         | ★                            | ★★            | ★                     | ★                         | ★                     | 9       |
| Mcdermoot et al. | ★                                    | ★                       | ★                         | ★                            | ★★            | ★                     | ★                         | ★                     | 9       |
| Wallin et al.    | ★                                    | ★                       | ★                         | ★                            | ★             | ★                     | ☆                         | ☆                     | 6       |

**Supplementary figure 1.** Results of sensitivity analysis. A. incidences of all-grade hypertension; B. incidences of high-grade hypertension; C. incidences of all-grade hypertension with RCC; D. incidences of high-grade hypertension with RCC; E. incidences of all-grade hypertension with non-RCC; F. incidences of high-grade hypertension with non-RCC; G. relative risk of atezolizumab plus bevacizumab-associated hypertension versus control from the four randomized controlled trials of patients.

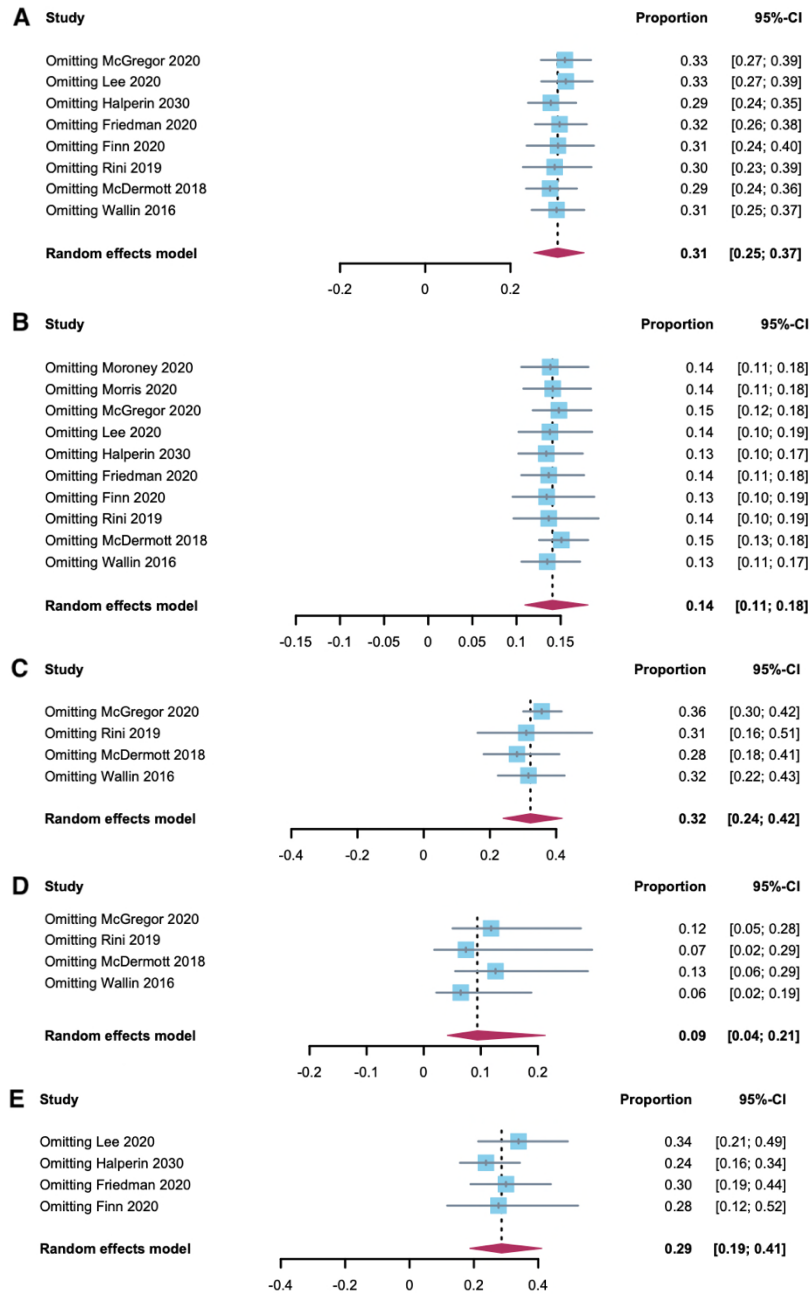

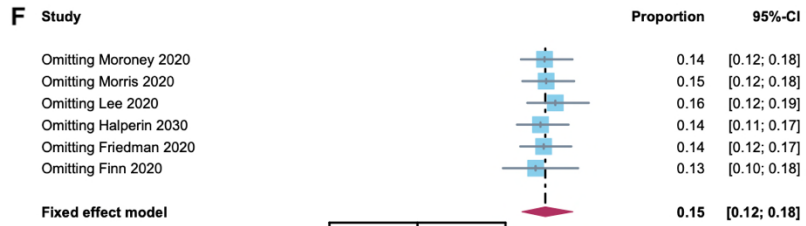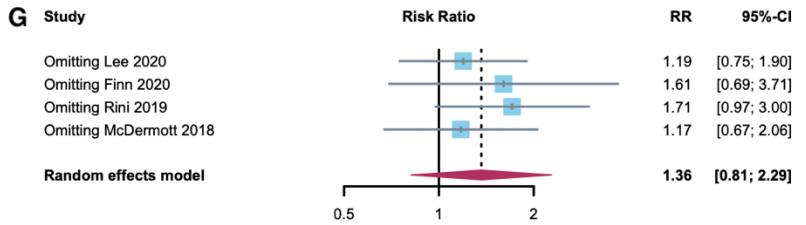

**Supplementary figure 2.** Forest plot for subgroup analyses. A. relative risk of atezolizumab plus bevacizumab-associated hypertension versus atezolizumab from the two randomized controlled trials; B. relative risk of atezolizumab plus bevacizumab-associated hypertension versus anti-VEGF agents from the three randomized controlled trials.

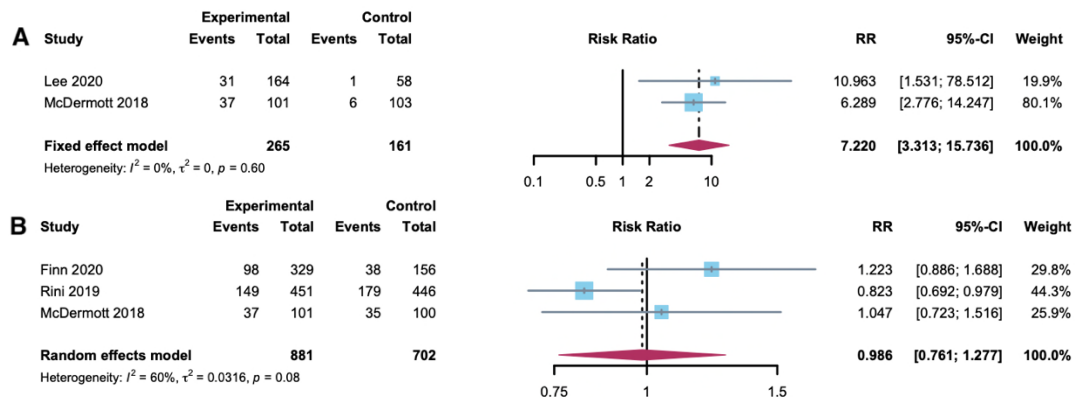



**Supplementary figure 3.** Funnel plot for publication bias. A. incidences of all-grade hypertension; B. incidences of high-grade hypertension; C. incidences of all-grade hypertension with RCC; D. incidences of high-grade hypertension with RCC; E. incidences of all-grade hypertension with non-RCC; F. incidences of high-grade hypertension with non-RCC; G. relative risk of atezolizumab plus bevacizumab-associated hypertension versus control from the four randomized controlled trials of patients.

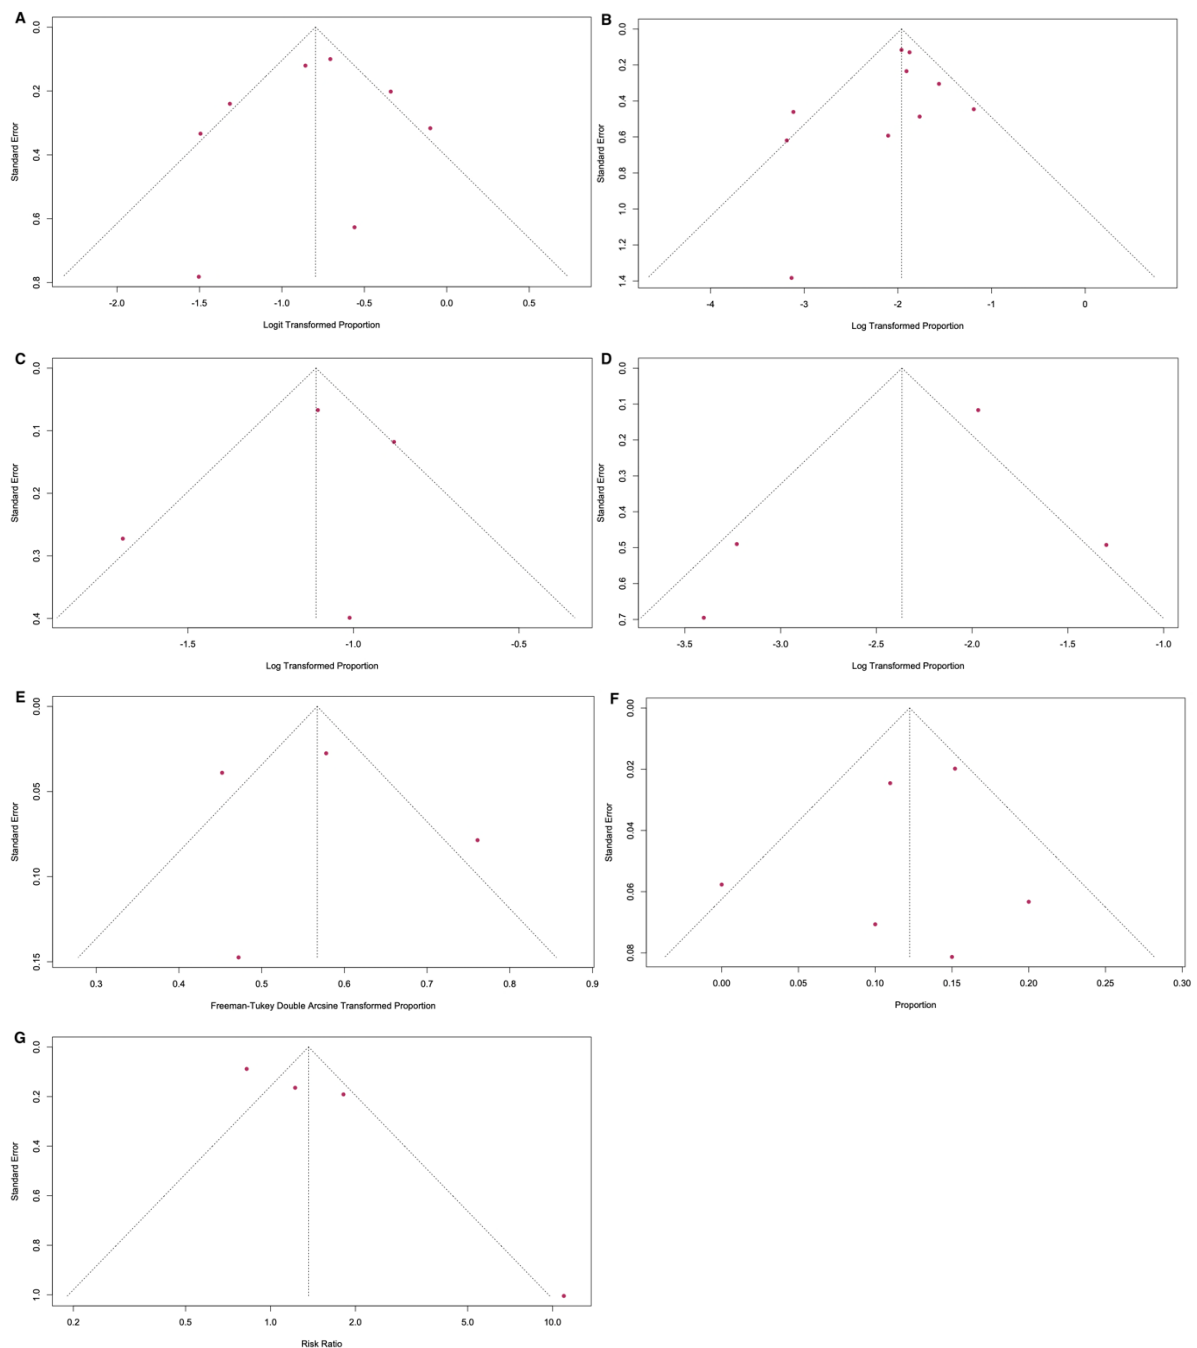

**Supplementary figure 4.** Assessment of publication bias by Egger's test. A. incidences of all-grade hypertension; B. incidences of high-grade hypertension; C. incidences of all-grade hypertension with RCC; D. incidences of high-grade hypertension with RCC; E. incidences of all-grade hypertension with non-RCC; F. incidences of high-grade hypertension with non-RCC; G. relative risk of atezolizumab plus bevacizumab-associated hypertension versus control from the four randomized controlled trials of patients.

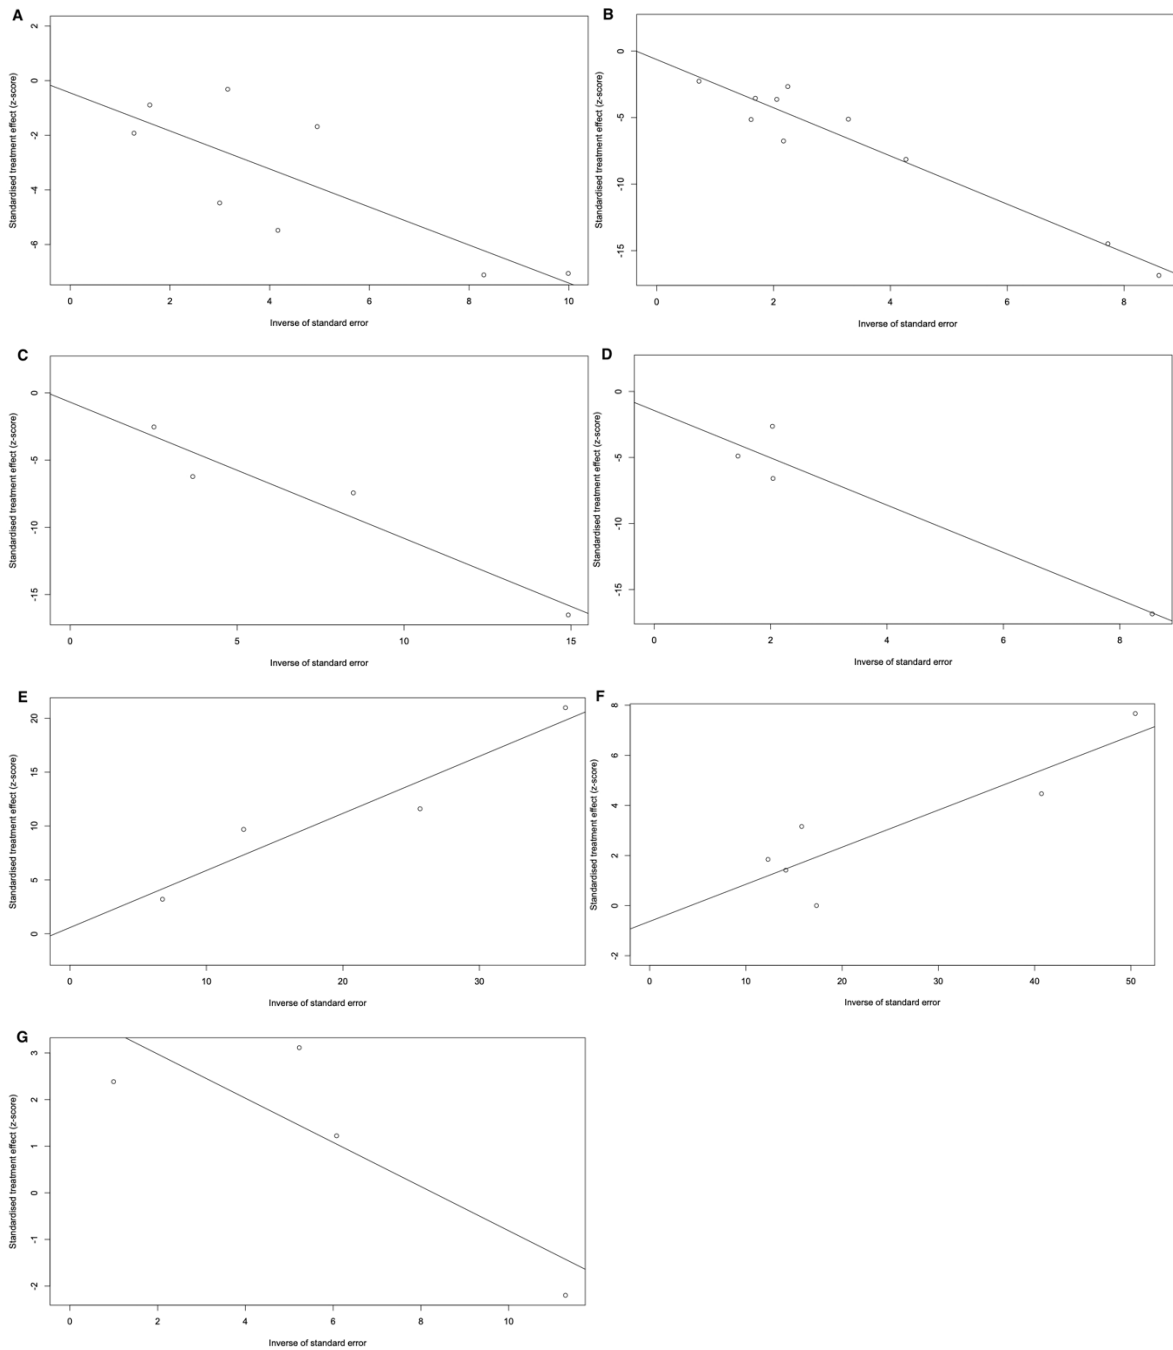

**Supplementary figure 5.** Assessment of publication bias by Begg's test. A. incidences of all-grade hypertension; B. incidences of high-grade hypertension; C. incidences of all-grade hypertension with RCC; D. incidences of high-grade hypertension with RCC; E. incidences of all-grade hypertension with non-RCC; F. incidences of high-grade hypertension with non-RCC; G. relative risk of atezolizumab plus bevacizumab-associated hypertension versus control from the four randomized controlled trials of patients.

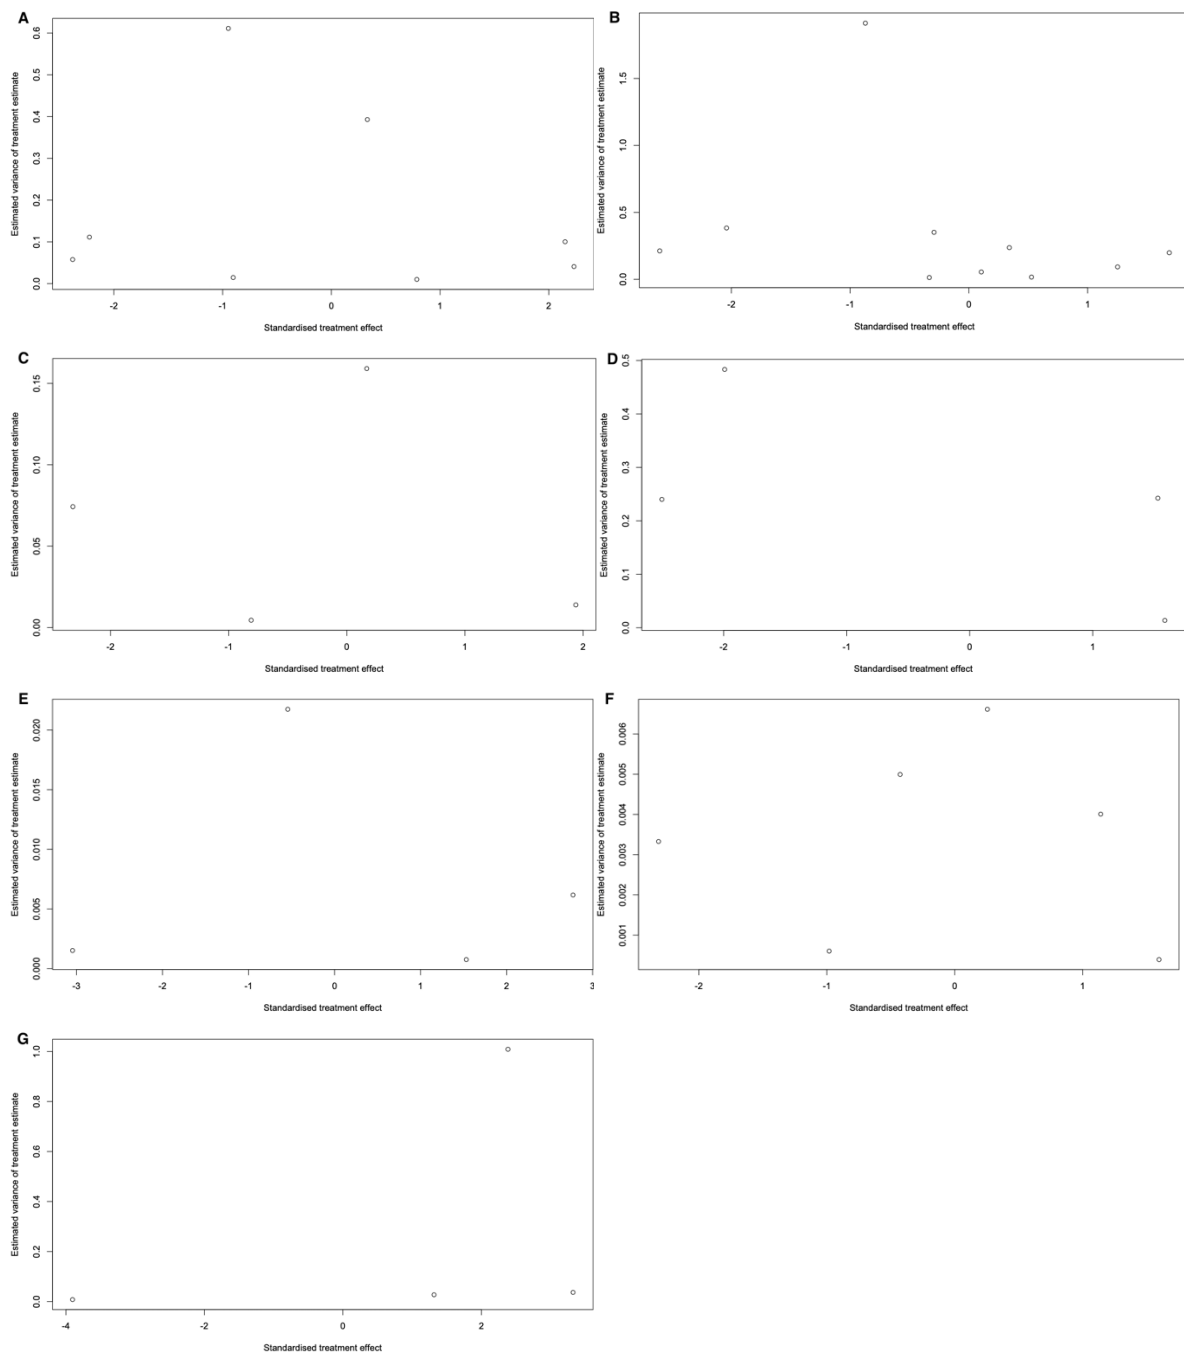

Supplement: DataSheet_1.pdf [file DataSheet_1.pdf]
